# Supplementary material for: Genetic and Non-genetic Predictors of LINE-1 Methylation in Leukocyte DNA
Source: PubMed Central journal article supplement (PMC3672919; doi:10.1289/ehp.1206068), 2013-04-03
Supplement: ehp.1206068.s001.pdf [file ehp.1206068.s001.pdf]

## **Supplemental Material**

### **Genetic and Non-genetic Predictors of LINE-1 Methylation in Leukocyte DNA**

Salman M. Tajuddin<sup>1</sup>, André F. S. Amaral<sup>1</sup>, Agustín F. Fernández<sup>2</sup>, Sandra Rodríguez-Rodero<sup>2</sup>, Ramón María Rodríguez<sup>2</sup>, Lee E. Moore<sup>3</sup>, Adonina Tardón<sup>4</sup>, Alfredo Carrato<sup>5,6</sup>, Montserrat García-Closas<sup>7</sup>, Debra T. Silverman<sup>3</sup>, Brian P. Jackson<sup>8</sup>, Reina García-Closas<sup>9</sup>, Ashley L. Cook<sup>1</sup>, Kenneth P. Cantor<sup>10</sup>, Stephen Chanock<sup>3</sup>, Manolis Kogevinas<sup>11</sup>, Nathaniel Rothman<sup>3</sup>, Francisco X. Real<sup>12,13</sup>, Mario F. Fraga<sup>2,14\*</sup>, Núria Malats<sup>1\*</sup> for the Spanish Bladder Cancer (SBC)/EPICURO Study investigators<sup>15</sup>

<sup>1</sup>Genetic and Molecular Epidemiology Group, Spanish National Cancer Research Centre (CNIO), Madrid, Spain

<sup>2</sup>Cancer Epigenetics Laboratory, Instituto Universitario de Oncología del Principado de Asturias (IUOPA), HUCA, Universidad de Oviedo, Oviedo, Spain

<sup>3</sup>National Cancer Institute, Bethesda, Maryland, USA

<sup>4</sup>Universidad de Oviedo, Oviedo, Spain

<sup>5</sup>Hospital General Universitario de Elche, Elche, Spain

<sup>6</sup>Hospital Ramon y Cajal, Madrid, Spain

<sup>7</sup>Division of Genetics and Epidemiology, Institute of Cancer Research, Sutton, United Kingdom

<sup>8</sup>Trace Element Analysis Core, Department of Earth Sciences, Dartmouth College, Hanover, New Hampshire, USA

<sup>9</sup>Unidad de Investigación, Hospital Universitario de Canarias, La Laguna, Spain

<sup>10</sup>KP Cantor Environmental LLC, Silver Spring, Maryland, USA

<sup>11</sup>Centre for Research in Environmental Epidemiology (CREAL), Barcelona, Spain

<sup>12</sup>Epithelial Carcinogenesis Group, Spanish National Cancer Research Centre (CNIO), Madrid, Spain

<sup>13</sup>Departament de Ciències Experimentals i de la Salut, Universitat Pompeu Fabra, Barcelona, Spain

<sup>14</sup>Department of Immunology and Oncology, Centro Nacional de Biotecnología/CNB-CSIC, Cantoblanco, Madrid, Spain

<sup>15</sup>Spanish Bladder Cancer (SBC)/EPICURO Study investigators are listed in Appendix 1

\* Co-last authors contributed equally to this work.

Address Correspondence to:

Núria Malats, M.D., Ph.D.

Genetic and Molecular Epidemiology Group

Spanish National Cancer Research Centre (CNIO)

C/ Melchor Fernández Almagro, 3

28029 Madrid, Spain

Phone: +34-912-246-900 (ext. 3330)

Fax: +34-912-246-911

E-mail: [nmalats@cnio.es](mailto:nmalats@cnio.es)

| Table of Contents                     | Page |
|---------------------------------------|------|
| Supplemental Material, Table S1.....  | 4    |
| Supplemental Material, Table S2.....  | 7    |
| Supplemental Material, Table S3.....  | 8    |
| Supplemental Material, Table S4.....  | 9    |
| Supplemental Material, Table S5.....  | 13   |
| Supplemental Material, Table S6.....  | 15   |
| Supplemental Material, Table S7.....  | 16   |
| Supplemental Material, Figure S1..... | 17   |

**Supplemental Material, Table S1. List of genes involved in the one-carbon metabolism pathway selected for the present study**

| <b>Chromosome location</b> | <b>Gene symbol [ID]<sup>a</sup></b> | <b>Gene name</b>                                                                                          | <b>Gene function</b>                                                                                                                                                                                                              |
|----------------------------|-------------------------------------|-----------------------------------------------------------------------------------------------------------|-----------------------------------------------------------------------------------------------------------------------------------------------------------------------------------------------------------------------------------|
| 1p31.1                     | <i>CTH</i>                          | Cystathionase                                                                                             | Converts cystathione derived from methionine into cysteine.                                                                                                                                                                       |
| 1p36.3                     | <i>MTHFR</i>                        | Methylenetetrahydrofolate reductase (NAD(P)H)                                                             | Catalyzes the conversion of 5,10-methylenetetrahydrofolate to 5-methyltetrahydrofolate.                                                                                                                                           |
| 1q43                       | <i>MTR</i>                          | 5-methyltetrahydrofolate-homocysteine methyltransferase                                                   | Catalyzes the final step in methionine biosynthesis.                                                                                                                                                                              |
| 2p23                       | <i>DNMT3A</i>                       | DNA (cytosine-5-)-methyltransferase 3 alpha                                                               | Functions in de novo methylation of cytosine residues.                                                                                                                                                                            |
| 2q35                       | <i>ATIC</i>                         | 5-aminoimidazole-4-carboxamide ribonucleotide formyltransferase/IMP(inosine monophosphate) cyclohydrolase | Catalyzes the last two steps of the de novo purine biosynthetic pathway. The N-terminal domain has phosphoribosylaminoimidazolecarboxamide formyltransferase activity, and the C-terminal domain has IMP cyclohydrolase activity. |
| 3p21.1                     | <i>CHDH</i>                         | Choline dehydrogenase                                                                                     | Encodes a protein that localizes to the mitochondrion. Variations in this gene can affect susceptibility to choline deficiency.                                                                                                   |
| 3q21.3                     | <i>ALDH1L1</i>                      | Aldehyde dehydrogenase 1 family, member L1                                                                | Catalyzes the conversion of 10-formyltetrahydrofolate, NADP, and water to tetrahydrofolate, NADPH, and carbon dioxide.                                                                                                            |
| 5p15.31                    | <i>MTRR</i>                         | 5-methyltetrahydrofolate-homocysteine methyltransferase reductase                                         | Regenerates a functional methionine synthase via reductive methylation                                                                                                                                                            |
| 5q11.2-q13.2               | <i>DHFR</i>                         | Dihydrofolate reductase                                                                                   | Converts dihydrofolate into tetrahydrofolate, a methyl group shuttle required for the de novo synthesis of purines, thymidylic acid, and certain amino acids.                                                                     |
| 5q13.1-q15                 | <i>BHMT</i>                         | Betaine-homocysteine S-methyltransferase                                                                  | Catalyzes the conversion of betaine and homocysteine to dimethylglycine and methionine, respectively.                                                                                                                             |
| 6p12                       | <i>GNMT</i>                         | Glycine N-methyltransferase                                                                               | Catalyzes the conversion of S-adenosyl-L-methionine (along with glycine) to S-adenosyl-L-homocysteine and sarcosine.                                                                                                              |

| <b>Chromosome location</b> | <b>Gene symbol [ID]<sup>a</sup></b> | <b>Gene name</b>                                                                      | <b>Gene function</b>                                                                                                                                                                                                               |
|----------------------------|-------------------------------------|---------------------------------------------------------------------------------------|------------------------------------------------------------------------------------------------------------------------------------------------------------------------------------------------------------------------------------|
| 10q24.32                   | <i>AS3MT</i>                        | Arsenic (+3 oxidation state) methyltransferase                                        | Catalyzes the transfer of a methyl group from S-adenosyl-L-methionine to trivalent arsenical and play a role in arsenic metabolism.                                                                                                |
| 11p11.2                    | <i>FOLH1</i>                        | Folate hydrolase (prostate-specific membrane antigen)1/glutamate carboxypeptidase II/ | Acts as a glutamate carboxypeptidase on different alternative substrates, including the nutrient folate and the neuropeptide N-acetyl-l-aspartyl-l-glutamate.                                                                      |
| 14q24                      | <i>MTHFD</i>                        | Methylenetetrahydrofolate dehydrogenase (NADP+ dependent) 1                           | Catalyzes one of three sequential reactions in the interconversion of 1-carbon derivatives of tetrahydrofolate.                                                                                                                    |
| 15q25.1                    | <i>MTHFS</i>                        | 5,10-methenyltetrahydrofolate synthetase                                              | Catalyzes the conversion of 5-formyltetrahydrofolate to 5,10-methenyltetrahydrofolate, a precursor of reduced folates involved in 1-carbon metabolism.                                                                             |
| 17p11.2                    | <i>PEMT</i>                         | Phosphatidylethanolamine N-methyltransferase                                          | Converts phosphatidylethanolamine to phosphatidylcholine by sequential methylation in the liver.                                                                                                                                   |
| 17p11.2                    | <i>SHMT1</i>                        | Serine hydroxymethyltransferase 1                                                     | Catalyzes the reversible conversion of serine and tetrahydrofolate to glycine and 5,10-methylene tetrahydrofolate. This reaction provides one carbon units for synthesis of methionine, thymidylate, and purines in the cytoplasm. |
| 18p11.32                   | <i>TYMS</i>                         | Thymidylate synthetase                                                                | Catalyzes the methylation of deoxyuridylate to deoxythymidylate using 5,10-methylenetetrahydrofolate as a cofactor.                                                                                                                |
| 19p13.2                    | <i>DNMT1</i>                        | DNA (cytosine-5-)-methyltransferase 1                                                 | Establishes and regulates tissue-specific patterns of methylated cytosine residues.                                                                                                                                                |
| 20q11.2                    | <i>DNMT3B</i>                       | DNA (cytosine-5-)-methyltransferase 3 beta                                            | Functions in de novo methylation of cytosine residues.                                                                                                                                                                             |
| 21q22.1; 21q22.11          | <i>GART</i>                         | Glycinamide ribonucleotide transformylase                                             | Encodes a protein that has phosphoribosylglycinamide formyltransferase, phosphoribosylglycinamide synthetase, phosphoribosylaminoimidazole synthetase activity which is required for de novo purine biosynthesis.                  |
| 21q22.3                    | <i>CBS</i>                          | Cystathionine-beta-synthase                                                           | Acts as a homotetramer to catalyze the conversion of homocysteine to cystathionine, the first step in the                                                                                                                          |

| <b>Chromosome location</b> | <b>Gene symbol [ID]<sup>a</sup></b> | <b>Gene name</b>                                        | <b>Gene function</b>                                                                                                        |
|----------------------------|-------------------------------------|---------------------------------------------------------|-----------------------------------------------------------------------------------------------------------------------------|
| 21q22.3                    | <i>SLC19A1</i>                      | Solute carrier family 19 (folate transporter), member 1 | transsulfuration pathway.<br>Transports folate and is involved in the regulation of intracellular concentrations of folate. |
| 22q12.2                    | <i>TCN2</i>                         | Transcobalamin II                                       | Binds and mediates the transport of vitamin B12 into cells.                                                                 |

<sup>a</sup>Maglott D, Ostell J, Pruitt KD, Tatusova T. 2005. Entrez Gene: gene-centered information at NCBI. *Nucleic Acids Res* 33:D54-D58.

**Supplemental Material, Table S2. Distribution of SNPs studied in the present study by genotyping platform.**

This table is provided as a separate Excel file.

**Supplemental Material, Table S3. List of single nucleotide polymorphisms with significant Fisher's exact test selected for further analysis (p-value  $\leq$  0.05)**

| dbSNP Identifier | N   | MAF  | Chromosome | Location <sup>a</sup> | Gene           | Region in the gene | P-HWE | Fisher's exact test p-value <sup>b</sup> |
|------------------|-----|------|------------|-----------------------|----------------|--------------------|-------|------------------------------------------|
| rs11683424       | 875 | 0.12 | 2          | 25342636              | <i>DNMT3A</i>  | Intron             | 0.20  | 0.006                                    |
| rs7581217        | 875 | 0.39 | 2          | 25378448              | <i>DNMT3A</i>  | Intron             | 0.62  | 0.002                                    |
| rs1550117        | 875 | 0.08 | 2          | 25419411              | <i>DNMT3A</i>  | Flanking 5'UTR     | 0.81  | 0.009                                    |
| rs4369857        | 875 | 0.04 | 2          | 215841917             | <i>ATIC</i>    | Flanking 5'UTR     | 1.00  | 0.02                                     |
| rs7563206        | 874 | 0.47 | 2          | 215898899             | <i>ATIC</i>    | Intron             | 0.84  | 0.04                                     |
| rs1880586        | 875 | 0.47 | 2          | 215903416             | <i>ATIC</i>    | Intron             | 0.89  | 0.04                                     |
| rs4673991        | 875 | 0.32 | 2          | 215920334             | <i>ATIC</i>    | Intron             | 0.31  | 0.004                                    |
| rs4673993        | 875 | 0.32 | 2          | 215920584             | <i>ATIC</i>    | Intron             | 0.31  | 0.004                                    |
| rs4672768        | 873 | 0.32 | 2          | 215922369             | <i>ATIC</i>    | Intron             | 0.31  | 0.005                                    |
| rs10498036       | 875 | 0.40 | 2          | 215922737             | <i>ATIC</i>    | Flanking 3'UTR     | 0.57  | 0.004                                    |
| rs7604984        | 875 | 0.40 | 2          | 215925884             | <i>ATIC</i>    | Flanking 3'UTR     | 0.62  | 0.003                                    |
| rs7085104        | 875 | 0.38 | 10         | 104618863             | <i>AS3MT</i>   | Flanking 5'UTR     | 1.00  | 0.02                                     |
| rs1077965        | 875 | 0.41 | 15         | 77852392              | <i>MTHFS</i>   | Flanking 3'UTR     | 0.58  | 0.007                                    |
| rs11855092       | 875 | 0.24 | 15         | 77877293              | <i>MTHFS</i>   | Flanking 3'UTR     | 0.31  | 0.03                                     |
| rs1380642        | 875 | 0.18 | 15         | 77883926              | <i>MTHFS</i>   | Flanking 3'UTR     | 0.57  | 0.01                                     |
| rs4646340        | 875 | 0.37 | 17         | 17434740              | <i>PEMT</i>    | Intron             | 0.51  | 0.04                                     |
| rs7215833        | 875 | 0.36 | 17         | 17448033              | <i>PEMT</i>    | Flanking 5'UTR     | 0.51  | 0.02                                     |
| rs914238         | 875 | 0.49 | 21         | 45840089              | <i>SLC19A1</i> | Flanking 5'UTR     | 0.89  | 0.002                                    |
| rs2838965        | 873 | 0.42 | 21         | 45846212              | <i>SLC19A1</i> | Flanking 5'UTR     | 0.33  | 0.02                                     |
| rs9606756        | 875 | 0.12 | 22         | 29336860              | <i>TCN2</i>    | Exon               | 0.87  | 0.005                                    |
| rs9621049        | 875 | 0.11 | 22         | 29343419              | <i>TCN2</i>    | Exon               | 0.86  | 0.02                                     |
| rs4820887        | 875 | 0.10 | 22         | 29346914              | <i>TCN2</i>    | Intron             | 0.85  | 0.01                                     |

MAF, minor allele frequency. P-HWE, Chi-square test p-value for Hardy-Weinberg equilibrium.

<sup>a</sup>Human Genome Build 36.3 location.

<sup>b</sup>Fisher's exact test p-value from comparison of categorical variables LINE-1 methylation in tertiles (<56.7%, 56.7–58.6%, and >58.6%) and SNPs modeled according to codominant mode of inheritance coded as "0" for wild type, "1" heterozygous variant, "2" for homozygous variant.



**Supplemental Material, Table S4. Distributional characteristics of study subjects and LINE-1 methylation in the SBC/EPICURO Study**

| <b>Variables</b>                          | <b>N</b> | <b>Percent</b> | <b>LINE-1 methylation (%)<br/>Median (IQR)</b> | <b>P-value<sup>a</sup></b> |
|-------------------------------------------|----------|----------------|------------------------------------------------|----------------------------|
| <b>Age (years)</b>                        |          |                |                                                |                            |
| <60                                       | 253      | 28.4           | 57.4 (3.7)                                     | 0.9                        |
| 60-69                                     | 342      | 38.3           | 57.4 (3.2)                                     |                            |
| 70+                                       | 297      | 33.3           | 57.5 (3.2)                                     |                            |
| <b>Gender</b>                             |          |                |                                                |                            |
| Male                                      | 792      | 88.8           | 57.5 (3.3)                                     | 0.04                       |
| Female                                    | 100      | 11.2           | 57.1 (3.2)                                     |                            |
| <b>Region</b>                             |          |                |                                                |                            |
| Barcelona                                 | 168      | 18.8           | 57.5 (3.0)                                     | 0.1                        |
| Vallès                                    | 135      | 15.1           | 57.1 (2.6)                                     |                            |
| Elche                                     | 73       | 8.2            | 57.1 (2.5)                                     |                            |
| Tenerife                                  | 145      | 16.3           | 57.3 (3.2)                                     |                            |
| Asturias                                  | 371      | 41.6           | 57.7 (3.9)                                     |                            |
| <b>Body mass index (kg/m<sup>2</sup>)</b> |          |                |                                                |                            |
| <25.0                                     | 372      | 53.4           | 57.4 (3.3)                                     | 0.9                        |
| 25.0-26.99                                | 148      | 21.2           | 57.4 (3.7)                                     |                            |
| 27.0-29.99                                | 120      | 17.2           | 57.5 (3.2)                                     |                            |
| ≥30.0                                     | 57       | 8.2            | 57.6 (3.5)                                     |                            |
| Missing data                              | 195      |                |                                                |                            |
| <b>Smoking status</b>                     |          |                |                                                |                            |
| Non-smoker                                | 255      | 28.7           | 57.4 (3.2)                                     | 0.2                        |
| Occasional smoker                         | 66       | 7.4            | 58.0 (3.3)                                     |                            |
| Former smoker                             | 329      | 37.0           | 57.4 (3.3)                                     |                            |
| Current smoker                            | 239      | 26.9           | 57.4 (3.7)                                     |                            |
| Missing data                              | 3        |                |                                                |                            |
| <b>Tobacco type</b>                       |          |                |                                                |                            |
| Non-smoker                                | 255      | 31.0           | 57.4 (3.2)                                     | 0.2                        |
| Blond only                                | 99       | 12.0           | 57.0 (3.2)                                     |                            |
| Black only                                | 219      | 26.5           | 57.7 (3.6)                                     |                            |
| Blond and black                           | 154      | 18.7           | 57.3 (3.6)                                     |                            |
| Unknown                                   | 97       | 11.8           | 57.7 (3.0)                                     |                            |
| Missing data                              | 68       |                |                                                |                            |
| <b>Controls' diagnosis</b>                |          |                |                                                |                            |
| Hernia                                    | 332      | 37.2           | 57.4 (3.1)                                     | 0.8                        |
| Fracture & Trauma                         | 263      | 29.5           | 57.5 (4.0)                                     |                            |
| Hydrocele                                 | 122      | 13.7           | 57.6 (3.3)                                     |                            |
| Other Abdominal Surgery                   | 99       | 11.1           | 57.2 (2.9)                                     |                            |

| Variables                               | N   | Percent | LINE-1 methylation (%)<br>Median (IQR) | P-value <sup>a</sup> |
|-----------------------------------------|-----|---------|----------------------------------------|----------------------|
| Other Diseases                          | 76  | 8.5     | 57.6 (3.8)                             |                      |
| <b>Vitamin B1 intake (µg/day/kcal)</b>  |     |         |                                        |                      |
| < 0.66                                  | 323 | 50.1    | 57.5 (3.8)                             | 0.4                  |
| ≥0.66                                   | 322 | 49.9    | 57.4 (3.3)                             |                      |
| Missing data                            | 247 |         |                                        |                      |
| <b>Vitamin B2 intake (µg/day/kcal)</b>  |     |         |                                        |                      |
| < 0.91                                  | 323 | 50.1    | 57.4 (3.7)                             | 0.9                  |
| ≥0.91                                   | 322 | 49.9    | 57.5 (3.6)                             |                      |
| Missing Data                            | 247 |         |                                        |                      |
| <b>Vitamin B3 intake (µg/day/kcal)</b>  |     |         |                                        |                      |
| <10.08                                  | 323 | 50.1    | 57.5 (3.9)                             | 0.5                  |
| ≥10.08                                  | 322 | 49.9    | 57.4 (3.3)                             |                      |
| Missing Data                            | 247 |         |                                        |                      |
| <b>Vitamin B6 intake (µg/day/kcal)</b>  |     |         |                                        |                      |
| <1.00                                   | 323 | 50.1    | 57.4 (3.9)                             | 0.5                  |
| ≥1.00                                   | 322 | 49.9    | 57.4 (3.4)                             |                      |
| Missing Data                            | 247 |         |                                        |                      |
| <b>Vitamin B12 intake (µg/day/kcal)</b> |     |         |                                        |                      |
| <3.98                                   | 323 | 50.1    | 57.4 (3.7)                             | 0.8                  |
| ≥3.98                                   | 322 | 49.9    | 57.4 (3.6)                             |                      |
| Missing Data                            | 247 |         |                                        |                      |
| <b>Folate intake (µg/day/kcal)</b>      |     |         |                                        |                      |
| <166.74                                 | 323 | 50.1    | 57.4 (3.9)                             | 0.5                  |
| ≥166.74                                 | 322 | 49.9    | 57.5 (3.3)                             |                      |
| Missing Data                            | 247 |         |                                        |                      |
| <b>Protein intake (µg/day/kcal)</b>     |     |         |                                        |                      |
| <46.68                                  | 323 | 50.1    | 57.4 (3.7)                             | 0.97                 |
| ≥4.33                                   | 322 | 49.9    | 57.4 (3.6)                             |                      |
| Missing Data                            | 247 |         |                                        |                      |
| <b>Alcohol intake (µg/day/kcal)</b>     |     |         |                                        |                      |
| <4.33                                   | 323 | 50.1    | 57.4 (3.6)                             | 0.4                  |
| ≥4.33                                   | 322 | 49.9    | 57.4 (3.8)                             |                      |
| Missing Data                            | 247 |         |                                        |                      |
| <b>Fruit intake (g/day/kcal)</b>        |     |         |                                        |                      |
| <172.71                                 | 320 | 50.1    | 57.3 (3.2)                             | 0.6                  |
| ≥172.71                                 | 319 | 49.9    | 57.6 (4.2)                             |                      |
| Missing Data                            | 253 |         |                                        |                      |
| <b>Vegetable intake (g/day/kcal)</b>    |     |         |                                        |                      |
| <107.12                                 | 320 | 50.0    | 57.3 (4.0)                             | 0.3                  |

| Variables                                      | N   | Percent | LINE-1 methylation (%)<br>Median (IQR) | P-value <sup>a</sup> |
|------------------------------------------------|-----|---------|----------------------------------------|----------------------|
| ≥107.12                                        | 320 | 50.0    | 57.6 (3.3)                             |                      |
| Missing Data                                   | 252 |         |                                        |                      |
| <b>Fruit and vegetable intake (g/day/kcal)</b> |     |         |                                        |                      |
| <295.61                                        | 320 | 50.1    | 57.4 (3.5)                             | 0.9                  |
| ≥295.61                                        | 319 | 49.9    | 57.4 (3.9)                             |                      |
| Missing Data                                   | 253 |         |                                        |                      |
| <b>Toenail aluminum (µg/g)</b>                 |     |         |                                        |                      |
| < 10.51                                        | 329 | 50.0    | 57.5 (3.6)                             | 0.5                  |
| ≥ 10.51                                        | 329 | 50.0    | 57.4 (3.3)                             |                      |
| Missing Data                                   | 234 |         |                                        |                      |
| <b>Toenail arsenic (µg/g)</b>                  |     |         |                                        |                      |
| <0.07                                          | 330 | 50.1    | 57.5 (3.8)                             | 0.7                  |
| ≥0.07                                          | 329 | 49.9    | 57.4 (3.3)                             |                      |
| Missing Data                                   | 233 |         |                                        |                      |
| <b>Toenail cadmium (µg/g)</b>                  |     |         |                                        |                      |
| <0.01                                          | 330 | 50.1    | 57.5 (3.2)                             | 0.4                  |
| ≥0.01                                          | 329 | 49.9    | 57.4 (3.6)                             |                      |
| Missing Data                                   | 233 |         |                                        |                      |
| <b>Toenail chromium (µg/g)</b>                 |     |         |                                        |                      |
| < 0.41                                         | 330 | 50.1    | 57.5 (3.8)                             | 0.6                  |
| ≥ 0.41                                         | 329 | 49.9    | 57.4 (3.2)                             |                      |
| Missing Data                                   | 233 |         |                                        |                      |
| <b>Toenail copper (µg/g)</b>                   |     |         |                                        |                      |
| < 3.38                                         | 329 | 49.9    | 57.5 (3.3)                             | 0.9                  |
| ≥3.38                                          | 330 | 50.1    | 57.4 (3.5)                             |                      |
| Missing Data                                   | 233 |         |                                        |                      |
| <b>Toenail iron (µg/g)</b>                     |     |         |                                        |                      |
| < 14.61                                        | 329 | 50.0    | 57.4 (3.1)                             | 0.3                  |
| ≥ 14.61                                        | 329 | 50.0    | 57.6 (3.7)                             |                      |
| Missing Data                                   | 234 |         |                                        |                      |
| <b>Toenail lead (µg/g)</b>                     |     |         |                                        |                      |
| <0.40                                          | 329 | 50.1    | 57.5 (3.1)                             | 0.7                  |
| ≥0.40                                          | 330 | 49.9    | 57.4 (3.6)                             |                      |
| Missing Data                                   | 233 |         |                                        |                      |
| <b>Toenail manganese (µg/g)</b>                |     |         |                                        |                      |
| < 0.33                                         | 330 | 50.1    | 57.4 (3.3)                             | 0.9                  |
| ≥ 0.33                                         | 329 | 49.9    | 57.5 (3.6)                             |                      |
| Missing Data                                   | 233 |         |                                        |                      |
| <b>Toenail nickel (µg/g)</b>                   |     |         |                                        |                      |

| Variables                      | N   | Percent | LINE-1 methylation (%)<br>Median (IQR) | P-value <sup>a</sup> |
|--------------------------------|-----|---------|----------------------------------------|----------------------|
| < 0.47                         | 329 | 49.9    | 57.5 (3.0)                             | 0.8                  |
| ≥ 0.47                         | 330 | 50.1    | 57.4 (3.9)                             |                      |
| Missing Data                   | 233 |         |                                        |                      |
| <b>Toenail selenium (µg/g)</b> |     |         |                                        |                      |
| <0.56                          | 330 | 50.1    | 57.4 (3.4)                             | 0.6                  |
| ≥0.56                          | 329 | 49.9    | 57.5 (3.5)                             |                      |
| Missing Data                   | 233 |         |                                        |                      |
| <b>Toenail vanadium (µg/g)</b> |     |         |                                        |                      |
| < 0.02                         | 326 | 50.1    | 57.5 (3.7)                             | 0.6                  |
| ≥ 0.02                         | 325 | 49.9    | 57.4 (3.3)                             |                      |
| Missing Data                   | 241 |         |                                        |                      |
| <b>Toenail zinc (µg/g)</b>     |     |         |                                        |                      |
| < 103.20                       | 329 | 49.9    | 57.5 (3.3)                             | 0.8                  |
| ≥103.20                        | 330 | 50.1    | 57.4 (3.7)                             |                      |
| Missing data                   | 233 |         |                                        |                      |
| <b>NAT2 phenotype</b>          |     |         |                                        |                      |
| Rapid/Intermediate acetylator  | 389 | 43.9    | 57.4 (3.5)                             | 0.8                  |
| Slow acetylator                | 498 | 56.1    | 57.5 (3.2)                             |                      |
| Missing data                   | 5   |         |                                        |                      |
| <b>GSTM1 genotype</b>          |     |         |                                        |                      |
| (+/, +/-)                      | 421 | 47.7    | 57.4 (3.5)                             | 0.6                  |
| (-/-)                          | 462 | 52.3    | 57.5 (3.1)                             |                      |
| Missing data                   | 9   |         |                                        |                      |
| <b>GSTT1 genotype</b>          |     |         |                                        |                      |
| (+/, +/-)                      | 688 | 77.7    | 57.5 (3.3)                             | 0.2                  |
| (-/-)                          | 198 | 22.3    | 57.4 (3.3)                             |                      |
| Missing data                   | 6   |         |                                        |                      |

IQR, interquartile range.

<sup>a</sup>P-value from the Kruskal-Wallis test.

**Supplemental Material, Table S5. Association between LINE-1 methylation and individual characteristics of study subjects in the SBC/EPICURO Study**

| <b>Variables</b>                          | <b>N</b> | <b><math>\beta^a</math> (95% CI)</b> | <b>P-value</b> |
|-------------------------------------------|----------|--------------------------------------|----------------|
| <b>Age (years)</b>                        | 892      | -0.004 (-0.02, 0.01)                 | 0.6            |
| <b>Gender</b>                             |          |                                      |                |
| Male                                      | 792      | Ref                                  |                |
| Female                                    | 100      | -0.5 (-1.0, 0.04)                    | 0.07           |
| <b>Region</b>                             |          |                                      |                |
| Barcelona                                 | 168      | Ref                                  |                |
| Vallès                                    | 135      | -0.2 (-0.7, 0.4)                     | 0.6            |
| Elche                                     | 73       | -0.5 (-1.1, 0.2)                     | 0.2            |
| Tenerife                                  | 145      | -0.1 (-0.7, 0.4)                     | 0.6            |
| Asturias                                  | 371      | 0.2 (-0.3, 0.6)                      | 0.5            |
| <b>Body mass index (kg/m<sup>2</sup>)</b> |          |                                      |                |
| <25.0                                     | 372      | Ref                                  |                |
| 25.0-26.99                                | 148      | -0.1 (-0.6, 0.3)                     | 0.5            |
| 27.0-29.99                                | 120      | 0.2 (-0.3, 0.7)                      | 0.3            |
| $\geq$ 30.0                               | 57       | 0.007 (-0.7, 0.7)                    | 0.9            |
| Missing data                              | 195      |                                      |                |
| <b>Controls' diagnosis</b>                |          |                                      |                |
| Hernia                                    | 332      | Ref                                  |                |
| Fracture & Trauma                         | 263      | -0.04 (-0.5, 0.4)                    | 0.8            |
| Hydrocele                                 | 122      | 0.2 (-0.4, 0.7)                      | 0.5            |
| Other Abdominal Surgery                   | 99       | 0.1 (-0.7, 0.4)                      | 0.6            |
| Other Diseases                            | 76       | 0.2 (-0.4, 0.8)                      | 0.6            |
| <b>Dietary intake<sup>b</sup></b>         |          |                                      |                |
| Vitamin B1 ( $\mu$ g/day/kcal)            | 645      | 0.6 (-0.5, 1.8)                      | 0.3            |
| Vitamin B2 ( $\mu$ g/day/kcal)            | 645      | 0.2 (-0.5, 0.9)                      | 0.6            |
| Vitamin B3 ( $\mu$ g/day/kcal)            | 645      | 0.03 (-0.04, 0.1)                    | 0.4            |
| Vitamin B6 ( $\mu$ g/day/kcal)            | 645      | 0.8 (0.01, 1.7)                      | 0.05           |
| Vitamin B12 ( $\mu$ g/day/kcal)           | 645      | -0.03 (-0.08, 0.02)                  | 0.2            |
| Folate ( $\mu$ g/day/kcal)                | 645      | 0.002 (-0.001, 0.01)                 | 0.1            |
| Protein ( $\mu$ g/day/kcal)               | 645      | 0.01 (-0.01, 0.03)                   | 0.3            |
| Alcohol ( $\mu$ g/day/kcal)               | 645      | -0.01 (-0.03, 0.02)                  | 0.5            |
| Fruit (g/day/kcal)                        | 639      | 0.0001 (-0.001, 0.002)               | 0.9            |
| Vegetable (g/day/kcal)                    | 640      | 0.002 (-0.0004, 0.004)               | 0.1            |
| Fruit and vegetable (g/day/kcal)          | 639      | 0.001 (-0.001, 0.002)                | 0.4            |
| <b>Toenail trace elements<sup>c</sup></b> |          |                                      |                |
| Aluminium ( $\mu$ g/g)                    | 658      | -0.003 (-0.01, 0.002)                | 0.2            |
| Arsenic ( $\mu$ g/g)                      | 659      | -3.3 (-5.7, -1.0)                    | 0.006          |
| Cadmium ( $\mu$ g/g)                      | 659      | 0.1 (-0.3, 0.6)                      | 0.7            |

| <b>Variables</b>              | <b>N</b> | <b><math>\beta^a</math> (95% CI)</b> | <b>P-value</b> |
|-------------------------------|----------|--------------------------------------|----------------|
| Chromium ( $\mu\text{g/g}$ )  | 659      | -0.01 (-0.05, 0.03)                  | 0.7            |
| Copper ( $\mu\text{g/g}$ )    | 659      | -0.01 (-0.06, 0.05)                  | 0.8            |
| Iron ( $\mu\text{g/g}$ )      | 658      | 0.002 (0.001, 0.004)                 | 0.008          |
| Lead ( $\mu\text{g/g}$ )      | 659      | -0.05 (-0.1, 0.03)                   | 0.2            |
| Manganese ( $\mu\text{g/g}$ ) | 659      | -0.05 (-0.2, 0.06)                   | 0.4            |
| Nickel ( $\mu\text{g/g}$ )    | 659      | 0.02 (0.01, 0.03)                    | 0.004          |
| Selenium ( $\mu\text{g/g}$ )  | 659      | 0.4 (-0.6, 1.3)                      | 0.4            |
| Vanadium ( $\mu\text{g/g}$ )  | 651      | -0.8 (-2.9, 1.3)                     | 0.4            |
| Zinc ( $\mu\text{g/g}$ )      | 659      | -0.001 (-0.004, 0.001)               | 0.4            |
| <b><i>NAT2</i> phenotype</b>  |          |                                      |                |
| Rapid/Intermediate            | 389      | Ref                                  |                |
| Slow                          | 498      | 0.2 (-0.1, 0.5)                      | 0.2            |
| Missing data                  | 5        |                                      |                |
| <b><i>GSTM1</i> genotype</b>  |          |                                      |                |
| (+/, +/-)                     | 421      | Ref                                  |                |
| (-/-)                         | 462      | 0.02 (-0.3, 0.3)                     | 0.9            |
| Missing data                  | 9        |                                      |                |
| <b><i>GSTT1</i> genotype</b>  |          |                                      |                |
| (+/, +/-)                     | 688      | Ref                                  |                |
| (-/-)                         | 198      | -0.2 (-0.6, 0.2)                     | 0.4            |
| Missing data                  | 6        |                                      |                |

<sup>a</sup>Adjusted for age, gender, and region.

<sup>b</sup>Data available for those who completed food frequency questionnaire.

<sup>c</sup>Data available for those who provided toe nail for trace element assessment.

Note: the exposure contrast for trace elements is 1- $\mu\text{g/g}$  and for dietary variables is 1- $\mu\text{g/day/kcal}$ .

**Supplemental Material, Table S6. Association between LINE-1 methylation and 15 single nucleotide polymorphisms in genes involved in the one-carbon metabolism pathway with nonsignificant results.**

This table is provided as a separate Excel file.

**Supplemental Material, Table S7.** Multivariable model of association between LINE-1 methylation and individual characteristics, toenail trace elements and single nucleotide polymorphisms among study subjects in the SBC/EPICURO Study

| <b>Variable</b>                        | <b>N</b> | <b><math>\beta^a</math> (95% CI)</b> | <b>P-value</b> | <b>Global p-value<sup>b</sup></b> |
|----------------------------------------|----------|--------------------------------------|----------------|-----------------------------------|
| <b>Age (years)</b>                     | 601      | -0.01 (-0.03, 0.01)                  | 0.2            |                                   |
| <b>Gender</b>                          |          |                                      |                |                                   |
| Male                                   | 534      | Ref                                  |                |                                   |
| Female                                 | 67       | -1.0 (-1.7, -0.3)                    | 0.006          |                                   |
| <b>Region</b>                          |          |                                      |                |                                   |
| Barcelona                              | 131      | Ref                                  |                |                                   |
| Valles                                 | 90       | -0.05 (-0.7, 0.6)                    | 0.9            |                                   |
| Elche                                  | 57       | -0.4 (-1.2, 0.3)                     | 0.3            |                                   |
| Tenerife                               | 82       | 0.2 (-0.5, 0.9)                      | 0.5            |                                   |
| Asturias                               | 241      | 0.1 (-0.4, 0.7)                      | 0.6            |                                   |
| <b>Tobacco Type</b>                    |          |                                      |                |                                   |
| Non-smoker                             | 187      | Ref                                  |                |                                   |
| Blond only                             | 76       | -0.5 (-1.2, 0.2)                     | 0.1            |                                   |
| Black only                             | 156      | 0.09 (-0.5, 0.7)                     | 0.7            |                                   |
| Blond and black                        | 118      | -0.6 (-1.2, 0.05)                    | 0.07           |                                   |
| Unknown                                | 64       | -0.07 (-0.8, 0.7)                    | 0.9            |                                   |
| <b>Toenail Trace Element</b>           |          |                                      |                |                                   |
| Arsenic ( $\mu\text{g/g}$ )            | 601      | -4.8 (-7.8, -1.8)                    | 0.002          |                                   |
| Iron ( $\mu\text{g/g}$ )               | 601      | 0.003 (0.001, 0.01)                  | 0.0004         |                                   |
| Nickel ( $\mu\text{g/g}$ )             | 601      | 0.01 (0.004, 0.03)                   | 0.005          |                                   |
| <b>Gene, dbSNP identifier</b>          |          |                                      |                |                                   |
| <b><i>DNMT3A</i>-rs7581217, C&gt;T</b> | 601      | 0.3 (0.003, 0.6)                     | 0.048          |                                   |
| <b><i>AS3MT</i>-rs7085104</b>          |          |                                      |                |                                   |
| AA/AG                                  | 518      | Ref                                  |                |                                   |
| GG                                     | 83       | 0.5 (-0.07, 1.1)                     | 0.09           |                                   |
| <b><i>MTHFS</i>-rs1380642</b>          |          |                                      |                |                                   |
| CC                                     | 409      | Ref                                  |                |                                   |
| CT                                     | 167      | 0.4 (-0.02, 0.9)                     | 0.06           | 0.005                             |
| TT                                     | 25       | -1.2 (-2.2, -0.2)                    | 0.02           |                                   |
| <b><i>SLC19A1</i>-rs914238</b>         |          |                                      |                |                                   |
| TT                                     | 159      | Ref                                  |                |                                   |
| TC                                     | 293      | 0.3 (-0.1, 0.8)                      | 0.2            | 0.07                              |
| CC                                     | 149      | -0.2 (-0.8, 0.3)                     | 0.5            |                                   |
| <b><i>TCN2</i>-rs9621049</b>           |          |                                      |                |                                   |
| CC/CT                                  | 593      | Ref                                  |                |                                   |
| TT                                     | 8        | 4.3 (0.9, 7.6)                       | 0.01           |                                   |
| <b><i>TCN2</i>-rs9606756</b>           |          |                                      |                |                                   |
| AA/AG                                  | 594      | Ref                                  |                |                                   |
| GG                                     | 7        | -2.3 (-7.1, 2.5)                     | 0.3            |                                   |
| <b><i>TCN2</i>-rs4820887</b>           |          |                                      |                |                                   |
| GG/GA                                  | 595      | Ref                                  |                |                                   |
| AA                                     | 6        | -0.6 (-6.7, 5.6)                     | 0.9            |                                   |

<sup>a</sup>Fully adjusted robust regression coefficient.

<sup>b</sup>Global p-value was estimated by using a two-degrees of freedom likelihood-ratio test.



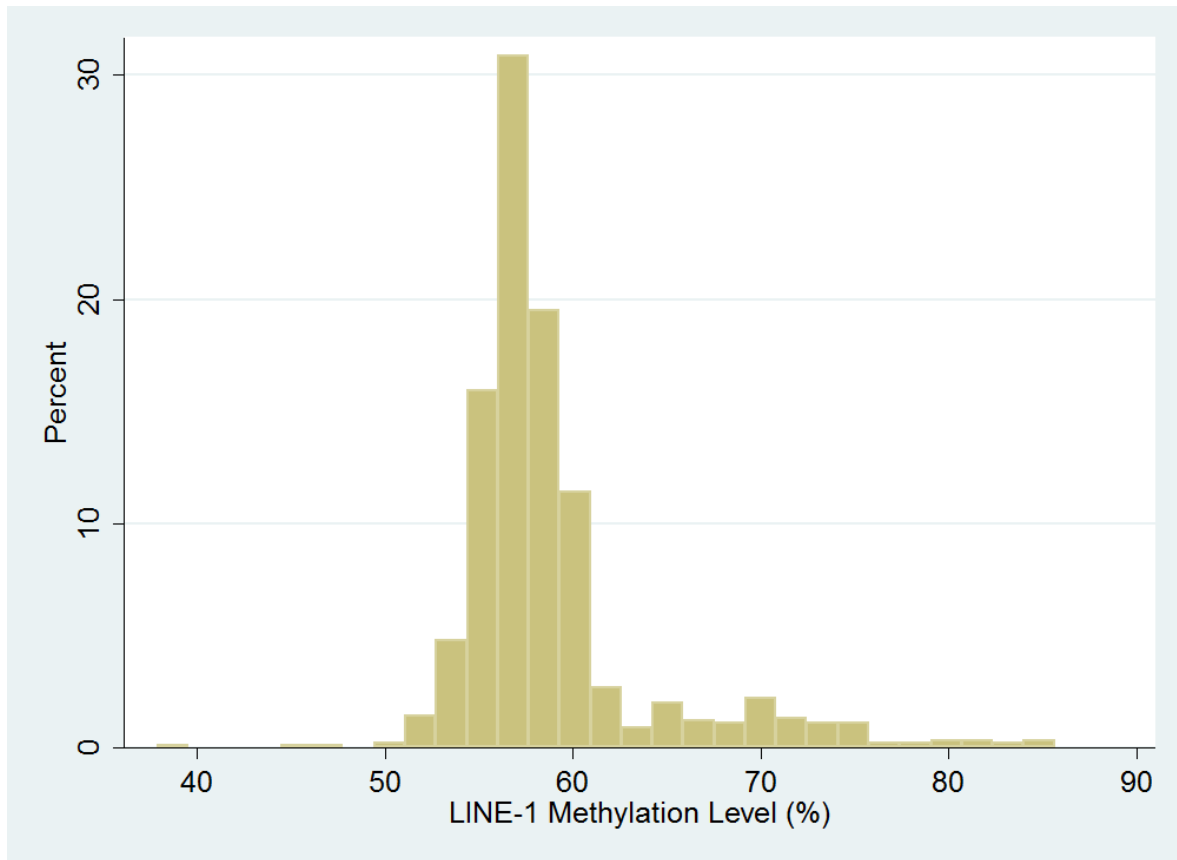

**Supplemental Material, Figure S1. Distribution of LINE-1 methylation among study subjects in the SBC/EPICURO study.**
